# Supplementary material
Source: ML conference proceedings conference paper supplement (https://aclanthology.org/P11-1107)
Supplement: Software [file library-testing.pdf › germanic-languages/doc/naacl07/library-testing.pdf]

# Harvesting grammars from the Matrix: Evaluating a bumper crop

anonymous

## Abstract

The Grammar Matrix customization system allows users to configure starter-grammars which add language-specific information across a range of linguistic phenomena to a cross-linguistic core grammar. With four phenomenon-libraries implemented so far (word order, negation, yes-no questions, and coordination) we can already define hundreds of thousands of language types. We present a methodology for creating test suites for any language type generated by the customization system and then evaluate the current system against those test suites for a small, random sample of language types.

## 1 Introduction

The Grammar Matrix is an open-source starter kit designed to jump-start the development of broad-coverage precision grammars, capable of both parsing and generation and suitable for use in a variety of NLP applications. Initial work on the Matrix ([self-reference omitted]) focused on the development of a cross-linguistic core grammar. The core grammar provides a solid foundation for sustained development of linguistically-motivated yet computationally tractable grammars (e.g., (Hellan and Haugereid, 2003; Kordoni and Neu, 2005)). However, the core grammar alone cannot parse and generate sentences: it needs to be specialized with language-specific information such as the order of

daughters in its rules (e.g., head-subject or subject-head), and it needs a lexicon. Although word order and many other phenomena vary across languages, there are still recurring patterns. To allow reuse of grammar code across languages and to increase the size of the jump-start provided by the Matrix, in more recent work ([self-reference omitted]), we have been developing ‘libraries’ implementing realizations of various linguistic phenomena. Through a web interface, grammar developers can configure an initial starter grammar by filling out a typological questionnaire about their language, which in turn calls a CGI script to ‘compile’ a grammar by making appropriate selections from the libraries.

The initial set of libraries includes: basic word order of major constituents in matrix clauses (SOV et al), optionality/obligatoriness of determiners, noun-determiner order, NP v. PP arguments of intransitive and transitive verbs, strategies for expressing sentential negation and yes-no questions, and strategies for constituent coordination. Even with this small set of phenomena covered (and limiting ourselves arbitrarily for testing purposes to a maximum of two coordination strategies per language), we have already defined a space of hundreds of thousands of possible grammars.<sup>1</sup>

Precision grammar engineering usually proceeds by continually testing the grammar against hand-constructed test suites as well as selections from nat-

<sup>1</sup>If all of the choices in the customization system were independent, we would have more than  $2 \times 10^{27}$  grammars. In actuality, constraints on possible combinations of choices (e.g., if a grammar has two case-marking adpositions, they must both be prepositions or both be postpositions) limit this space considerably.

urally occurring corpora, and refining the grammar as necessary. In this case, it is simply not practical to test all of the hundreds of thousands of grammars.

Our development methodology has been to test each option in each library as we create it. Testing any part of one library involves instantiating choices from at least a few other libraries (word order, lexicon). However, We have not attempted to systematically vary those other choices (e.g., strategies for expressing sentential negation may all be tested with SOV grammars). In this paper, we describe our methodology for validating the interaction of the libraries over a random sample of grammars from the grammar space and the associated creation of a test suite resource for future regression testing.

## 2 Background

The Grammar Matrix is written within the HPSG framework (Pollard and Sag, 1994; Sag et al., 2003). HPSG is a constraint-based grammar framework implemented in typed feature structures. HPSG grammars are declarative resources which can be used by both parsing and generation algorithms. The particular variant of the formalism we use is TDL (type description language) as interpreted by the LKB (Copestake, 2002) grammar development environment. The LKB includes grammar visualization and debugging tools, a parser, and a generator. For test suite management, we use [incr tsdb()] (Oepen, 2001).

The customization system presents users with a web-based interface through which they may input typological information about the language they wish to build a grammar for and then download an appropriately customized version of the Grammar Matrix. These little grammars describe very small fragments of the languages they model, but they are not toys. Their purpose is to be good starting points for further development. Usability considerations put two important constraints on the customization system:

1. The questions must be ones that are sensible to linguists, who tend to consider phenomena one at a time.
2. The output grammar code must be both readable and maintainable.

To achieve readable grammar code in the output TDL, among other things, we follow the guideline that any given constraint is stated only once. If multiple types require the same constraint, they should all inherit from some supertype which bears the constraint. In addition, all constraints pertaining to a particular type are stated in one place.

The Grammar Matrix customization system reads in the user's language specification and then outputs language-specific definitions of types (rule types, lexical entry types and ancillary structures) which inherit from types defined in the crosslinguistic core of the Matrix but add constraints appropriate for the language at hand. The customization system is implemented as a Python script which builds TDL descriptions, prints them to the appropriate files, includes the cross-linguistic shared files, and presents the user with an archive for downloading.

In light of the two basic constraints on the customization system, we have found that it is not possible to treat the libraries as black-box modules with respect to each other. The libraries are interdependent, and the portions of the script which interpret one part of the input questionnaire frequently need to make reference to information elicited by other parts of the questionnaire. For example, the customization system implements major constituent word order by specializing the head-complement and head-subject rule types provided in the core grammar. In an SOV language, these would both be cross-classified with the type head-final, and the head-subject rule would further be constrained to take only complement-saturated phrases as its head daughter. The TDL encoding of these constraints is shown in Figure 1.

Following standard practice in HPSG, we use the head-complement phrase not only for combining verbs with their complements to make VPs, but also for all other head complement structures, notably PPs, CPs, and VPs headed by auxiliaries. These three are notable because they are all implemented in the Grammar Matrix customization system and because the order of head and complement can differ among them. Consider Polish, a free word order language that nonetheless has prepositions. The order of a verb with respect to its complements is free, so we instantiate both head-comp and comp-head rules, which inherit from head-initial and head-

```

comp-head-phrase := basic-head-1st-comp-phrase & head-final.
subj-head-phrase := basic-head-subj-phrase & head-final &
[ HEAD-DTR.SYNSEM.LOCAL.CAT.VAL.COMPS < > ].

```

Figure 1: Specialized phrase structure rule types for SOV language

final respectively. Yet the prepositions must be barred from the head-final version lest the grammar license *postpositional* phrases by mistake. We do this by constraining the HEAD value of the comp-head phrase. Similarly, question particles (such as *est-ce que* in French or *ma* in Mandarin) are treated as complementizers: heads which select for an S complement. Since these, too, may differ in their word order properties from verbs (and prepositions), we need information about the question particles (elicited with the rest of the information about yes-no questions) before we have complete information about the head-complement rule. Furthermore, it is not simply a question of adding constraints to existing types: Consider the case of an SOV language with prepositions and sentence-initial question particles. This language would need a head-initial head-comp rule that can take only prepositions and complementizers as its head. To express the disjunction, we must use the supertype to *prep* and *comp*. This, in turn, means that we can't decide what constraint to put on the head value of the head-comp rule until we've considered questions as well as the basic word order facts.

We expect to study the issue of (non-)modularity as we add additional libraries to the resource and to investigate whether the grammar code can be refactored in such a way as to make the libraries into true modules. We suspect at this point that while it might be possible to reduce the degree of interdependence, it will not be possible to achieve completely independent libraries, because syntactic phenomena are inherently interdependent. Consider the case of agreement in NP coordination. In English and many other languages, coordinated NPs are always plural, regardless of the number value of the coordinands. Furthermore, the person of the coordinated NP is the minimal person value of the coordinands.

- (1) a. A cat and a dog are/\*is chasing a mouse.
- b. Kim and I should handle this ourselves.
- c. You and Kim should handle this yourselves.

In languages with gender systems, there is often a similar hierarchy of gender values, e.g., in French coordinated NPs the whole NP is feminine iff all coordinands are feminine and masculine otherwise. Thus it appears that it is not possible to define all of the necessary constraints on the coordination rules without having access to information about the agreement system.

Even if the libraries could be made completely independent at the customization level, however, the various parts of the grammar need to be able to interact properly in the analysis of individual sentences. Any sentence which illustrates sentential negation, a matrix yes-no question, or coordination also necessarily illustrates at least some aspects of word order, the presence v. absence of determiners and case-marking adpositions, and the subcategorization of the verb that heads the sentence. Furthermore, broad-coverage grammars need to allow negation, questions, coordination etc. all to appear in the same sentence.

Given the complexity of the system in general and the interdependence between the libraries, it is not sufficient to test each library in isolation. On the other hand, testing all possible combinations is not computationally tractable. In practice, in the course of developing any given library, we define grammars which test all options given by that library while keeping the rest of the choices more or less constant. The following sections describe the system we developed for sampling the rest of the grammar space, providing sentences with associated semantic representations and well-formedness predictions for evaluating any given grammar in that space, and thereby testing the cross-compatibility of our libraries.

### 3 Remarks on evaluation

There are many levels at which the Grammar Matrix customization system could and should be evaluated. At the highest level, its twin purposes are reducing the cost of developing broad-coverage precision grammars and crosslinguistic hypothesis test-

ing. Regarding the first, the system should be evaluated in terms of how much time and effort it saves in the development of grammars. Regarding the second, the system should be tested against naturally-occurring data as well as linguist-developed test suites from a typologically balanced sample of the world's languages. Each of these evaluations, but especially the second, is prohibitively expensive. By using the Grammar Matrix in grammar engineering courses where students each model different languages and by soliciting feedback from other users of the system, we are gathering information from actual languages which, while not giving any precise measure of the performance or correctness of the system overall, does allow us to incrementally refine the system.

This paper addresses a logically prior question to evaluation at the levels of usefulness or correctness, namely, whether the system indeed performs as intended. Each library is intended to produce (or play its part in producing) particular semantic representations for particular types of sentences. Given the overall complexity of the system, it is non-trivial to verify whether the libraries each function as intended. We describe here how we build the set of reference cases needed to answer this question, and evaluate the performance of a system developed with a small set of grammars against a sample from the much larger set.

In general, with precision grammars, there are three relevant metrics:

1. Coverage (% of grammatical sentences parsed, a type of recall)
2. Overgeneration (% of ungrammatical sentences parsed, a type of precision)
3. Accuracy (% exact match on semantics for the sentences parsed)

It follows that our gold standard resource will need to include both 'grammatical' and 'ungrammatical' examples, an indication of the intended grammaticality of each, and an associated semantic representation.

## 4 Methodology

### 4.1 Test suite resource

In order to test an arbitrary selection from the space of grammars we have defined, we need a parallel, independent system which can generate a gold standard for comparison for any arbitrary language type. Fortunately, this can be a simpler sort of grammar because it can be restricted to a finite set of sentences.

In creating this test resource, we make two abstractions. The first concerns vocabulary. Much of the idiosyncrasy in language resides in the lexicon, both in the form of morphemes and in the particular grammatical and collocational constraints associated with them. While our customization system allows for some lexical variation (e.g., each verb can select for either an NP or a PP subject), we assume that each grammar tested will draw its lexicon from the standardized set of lexical entries with standardized forms shown in Table 1 (though not all languages will use all of these forms). Using the same word forms for each grammar contributes substantially to building a single resource which can be adapted for the testing of each language type.

The second abstraction has to do with the notions of grammaticality and language. The grammars produced by the customization system are underspecified with respect to actual languages. For example, they currently lack any analysis of case (outside the option of case-marking adpositions) or agreement. In fact, they will always be underspecified, no matter how large the system gets, because it is not possible to describe all of the details of all of the world's languages in a system like this—just getting the 'core' grammar down will be challenge enough. Thus one and the same starter grammar might be extended into multiple models corresponding to multiple actual human languages. Accordingly, in what follows, we speak of language types rather than languages. When we talk about the predicted (un)grammaticality of a candidate string, we are referring to its predicted well- or ill-formedness given the information contained in the language type definition.

It turns out it is possible to create a gold-standard resource by enumerating a set of 'seed strings', producing all possible permutations of them, and then

| Form         | Description              | Options                                 |
|--------------|--------------------------|-----------------------------------------|
| det          | determiner               |                                         |
| n1, n2       | nouns                    | det is optional, obligatory, impossible |
| tv           | transitive verb          | subj, obj are NP or PP                  |
| iv           | intransitive verb        | subj is NP or PP                        |
| p-nom, p-acc | case-marking adpositions | preposition or postposition             |
| neg          | negative element         | adverb, prefix, suffix                  |
| co1, co2     | coordination marks       | word, prefix, suffix                    |
| qpart        | question particle        |                                         |

Table 1: Standardized lexicon

using regular expressions to filter the permutations.<sup>2</sup>

The seed strings can be grouped into semantic equivalence classes. From each equivalence class, we select one representative string which we parse with an appropriate grammar derived from the Matrix customization system. The parses that the LKB returns are actually large feature structures. From the feature structure, we ‘harvest’ the sub-feature structure which encodes the semantic representation of the whole string.

The remaining seed strings in the equivalence class differ from each other and from the ‘harvester’ string in the presence or absence of various semantically empty elements (case-marking adpositions and tense-marking auxiliaries<sup>3</sup>) and the affix v. word status of some of the formatives (negation, coordinator). To get the full set of candidate strings for a given semantic representation, we take all permutations of the formatives (including affixes) in each seed string.

The strings are filtered in two passes—once to remove strings which are predicted to be ungrammatical in all language types and a second time relative to the particular language type being tested. On each pass, a selection of ungrammatical examples is retained (and marked as such) in order to test for over-generation. It is not practical to retain all ungrammatical examples, as the resulting test suites would be too large (millions of sentences).

The filters are sensitive to the intended semantics of the candidate strings. This is important for two reasons: First and foremost, it allows us to create a

resource against which to measure the accuracy of the grammars, that is, their ability to produce all and only the correct semantic representations for a particular string. In many cases, the same string might well be grammatical in different language types, but only on different interpretations. For example, in a VSO language, *tv det n1 det n2* would be mapped to a declarative representation with ‘n1’ as the first semantic argument. In a VOS language, the same string would be mapped to a declarative representation with ‘n2’ as the first semantic argument. And in an SVO language which expressed yes-no questions with subject-verb agreement, that same string would map to a question representation with ‘n1’ as the first semantic argument.

Second, giving the filters access to semantic representations allows us to write filters for each dimension of variation mostly independently from the other dimensions. For example, since we know that the candidate strings with the same semantics as *det n1 det n2 tv* all have exactly two determiners in them, we can check that the determiners are adjacent to the nouns with the regular expression in (2).

(2)  $\text{det } n[12].*\text{det } n[12] \mid \text{det } n[12].*n[12] \text{ det} \mid n[12] \text{ det}.*n[12] \text{ det} \mid n[12] \text{ det}.*\text{det } n[12]$

Because we know, for any given equivalence class, what words might be in the string, it is easier to write filters that only make reference to one or two properties of the language definition at a time. This, in turn, means that we can create a gold standard resource over our particular seed strings for any language type that can be generated by the system.

A further complication arises in the case of am-

<sup>2</sup>This approach is similar in spirit to (Arnold et al., 1994).

<sup>3</sup>The auxiliaries are only semantically empty currently because we don’t yet have an analysis of tense/aspect.

biguous harvester strings. In our current set of seed strings, this arises with the coordination examples. The example in (3) has two semantic representations, schematized in (4).

(3) det n1 col n1 col n1 iv (cf. The horse and buggy and wagon left)

(4) a. iv (and (n1, and (n1, n1)))

b. iv (and (and (n1, n1), n1))

To handle this, we generalize the string-semantic representation mapping to relate strings to sets of semantic representations. In most cases, our candidate strings have just one semantic representation. In the ambiguous cases, they have more than one. The process of permuting the formatives of the seed strings can create candidate string-representation pairs with the same string. When we have created the gold-standard resource for a particular language type, we search for such cases and collapse them into one entry, where all of the semantic representations are included in its set.

In summary, candidate strings mapping to the same semantics can vary in the lexical elements they contain or the order of the lexical elements. We handle the first by enumerating seed strings and the second by permuting the lexical elements. The process of associating seed strings to semantic representations, creating candidate string-representation pairs, and then filtering them is shown in Figure 2.

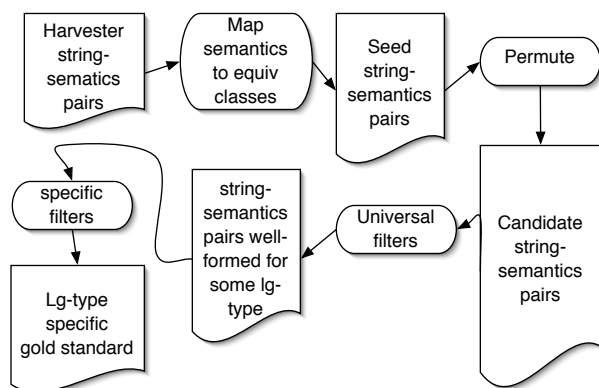

Figure 2: Filtering process

## 4.2 Random grammars

Underlying both the customization script and the web-based questionnaire form is a single file which defines the parameters available for configuration, their possible values, and how the choice should be displayed in the web interface presented to the user. We take advantage of this file yet again in a third script which reads it in and produces randomly selected grammars. For each choice it randomly selects among the possibilities (including the possibility of making no choice at all). The result is then run through the same validation routine that we use on the web page to alert users if they’ve made incompatible or incomplete specifications. Only grammars that pass the validation constraints are used.

## 5 Results

### 5.1 Test grammars

We worked with roughly 20 hand-configured grammars in developing the filters. In addition, we used 15 randomly generated grammars to do further debugging. We then produced 4 more randomly generated grammars and used them to measure system performance. Note that we are comparing the output of two separate systems (the grammars and the filters), and points of disagreement can indicate an error on either side. This is explored further in §5.3.

### 5.2 Performance

Our 30 harvester strings and 208 other seed strings together produced 12,754,772 candidate string-semantics pairs. Of these pairs, 25,840 were deemed potentially grammatical in some language. 258 universally ungrammatical examples (up to four per seed string) were kept. This universal resource was used as the input for creating the language type-specific resources for 3 language types. In addition to the selection of universally ungrammatical examples, a selection of examples that would otherwise have been filtered at the language-type specific level was also kept. The test suites for our test language types are described in Table 2.

For each language type, we calculated coverage (% of grammatical strings which parsed), overgeneration (% of ungrammatical strings which parsed), and semantic accuracy (% of test items for which we

| Lg. type | Gram. | Avg. readings | Ungram | Total |
|----------|-------|---------------|--------|-------|
| 1.       | 38    | 1.23          | 358    | 396   |
| 2.       | 3     | 1             | 342    | 345   |
| 3.       | 6     | 1             | 377    | 383   |

Table 2: Language-specific test suites (Preliminary numbers)

| Lg. type | Coverage |      | Over-generation |     | Accuracy |
|----------|----------|------|-----------------|-----|----------|
|          | #        | %    | #               | %   | %        |
| 1.       | 26       | 68.4 | 3               | 1.6 | 63       |
| 2.       | 3        | 100  | 2               | 0.6 | 100      |
| 3.       | 2        | 33.3 | 2               | 0.5 | 33       |

Table 3: Performance of test grammars (Preliminary numbers)

have exactly the right set of readings). The results are shown in Table 3.

### 5.3 Error analysis

The errors (both under- and over-generation) in Grammar 3 all relate to a single bug in the customization script. In this language, n1 has an obligatory specifier while n2 can't take a specifier at all. The customization script is erroneously making the specifier obligatory for all nouns. A related problem leads to the overgeneration in Grammar 1.

Grammar 1 is a particularly interesting case. It has more positive test items than the rest because it is a free word-order type. The ungrammatical examples are all clustered in the negation seed strings. This language type has specified VP attachment of the negative adverb as the means of expressing sentential negation. However, in some of the possible orders of S, V, and O, there is no VP, that is, no constituent which combines the V and O to the exclusion of S. Thus, there is nowhere for the VP-modifying adverb to attach. In this situation, the filters do not match what we have coded in the grammar customization system, and indeed, it is not entirely clear how to interpret this combination of choices.

## 6 Conclusion and future work

This initial system has allowed us to validate the testing approach and evaluate the grammar compilation system. It has also proved itself handy in diagnosing bugs in the compilation code, and we expect to be able to report on the effect that considering a larger sample of grammars in the debugging phase has on the performance of grammars sampled for testing. While the system is quite complex, we expect a moderate amount of further refinement to iron out most of the bugs.

We envision extending the current system by adding seed strings which more extensively test the interaction between the various modules (e.g., negation, questions, and coordination all in one), as well as more thorough coverage of the coordination module. More importantly, we are actively working on extending the linguistic coverage of the libraries provided in the customization system. As we do so, the verified test suites discussed here provide a baseline for regression testing. Furthermore, as the error analysis above suggests, we expect the bulk of the cases of filter-grammar mismatch to appear in typologically unusual grammar specifications. Thus, this test suite resource will also aid us in exploring the typological predictions of our system.

## References

- Doug Arnold, Martin Rondell, and Frederik Fouvry. 1994. Design and implementation of test suite tools. Technical report, University of Essex, UK. LRE 62-089 D-WP5.
- Ann Copestake. 2002. *Implementing Typed Feature Structure Grammars*. CSLI Publications, Stanford, CA.
- Lars Hellan and Petter Haugereid. 2003. Norsource: An exercise in matrix grammar-building design. In Emily M. Bender, Dan Flickinger, Freerik Fouvry, and Melanie Siegel, editors, *Proceedings of the Workshop on Ideas and Strategies for Multilingual Grammar Development, ESSLLI 2003*, pages 41–48, Vienna, Austria.
- Valia Kordoni and Julia Neu. 2005. Deep analysis of Modern Greek. In Keh-Yih Su, Jun'ichi Tsujii, and Jong-Hyeok Lee, editors, *Proceedings of IJCNLP 2004*, volume 3248, pages 674–683. Springer-Verlag, Berlin.

Stephan Oepen. 2001. [incr tsdb()] — Competence and performance laboratory. User manual. Technical report, Computational Linguistics, Saarland University, Saarbrücken, Germany.

Carl Pollard and Ivan A. Sag. 1994. *Head-Driven Phrase Structure Grammar*. Studies in Contemporary Linguistics. The University of Chicago Press and CSLI Publications, Chicago, IL and Stanford, CA.

Ivan A. Sag, Thomas Wasow, and Emily M. Bender. 2003. *Synactic Theory: A Formal Introduction*. CSLI, Stanford, CA, second edition.

|                         |                                |
|-------------------------|--------------------------------|
| det col n1 col n1 col   |                                |
| n1 iv                   | the cats, cats, and cats slept |
| det n1 col n1 col n1 iv | the cats, cats, and cats slept |
| n1 n1 col n1 iv         | cats, cats, and cats slept     |
| col n1 col n1 col n1 iv | cats, cats, and cats slept     |
| n1 col n1 col n1 iv     | cats, cats, and cats slept     |
| det n1 n1 co2 n1 iv     | the cats, cats, and cats slept |
| det co2 n1 co2 n1 co2   |                                |
| n1 iv                   | the cats, cats, and cats slept |
| det n1 co2 n1 co2 n1 iv | the cats, cats, and cats slept |
| n1 n1 co2 n1 iv         | cats, cats, and cats slept     |
| co2 n1 co2 n1 co2 n1 iv | cats, cats, and cats slept     |
| n1 co2 n1 co2 n1 iv     | cats, cats, and cats slept     |

## A. Appendix

The following strings were parsed with an SOV grammar with optional determiners in order to get the semantic representations for their equivalence class. Each string is paired here with an English example where n1 is *cats*, n2 is *dogs*, and the verbs as *slept* and *chased*. Note that, while a number of the coordination examples at the end share the same English gloss, their strings all differ and represent some of the many attested marking strategies for coordination. In our analysis, these strategies differ subtly in their semantics, including their degree of ambiguity (cf. [self reference omitted]).

|                        |                                |
|------------------------|--------------------------------|
| n1 iv                  | cats slept                     |
| det n1 iv              | the cats slept                 |
| n1 n2 tv               | cats chase dogs                |
| det n1 det n2 tv       | the cats chase the dogs        |
| det n1 n2 tv           | the cats chase dogs            |
| n1 det n2 tv           | cats chase the dogs            |
| n2 n1 tv               | dogs chase cats                |
| det n2 det n1 tv       | the dogs chase the cats        |
| det n2 n1 tv           | the dogs chase cats            |
| n2 det n1 tv           | dogs chase the cats            |
| n1 n2 neg tv           | cats don't chase dogs          |
| det n1 det n2 neg tv   | the cats don't chase           |
|                        | the dogs                       |
| n2 n1 neg tv           | dogs don't chase cats          |
| det n2 det n1 neg tv   | the dogs don't chase           |
|                        | the cats                       |
| n1 n2 tv qpart         | do cats chase dogs?            |
| det n1 det n2 tv qpart | do the cats chase the dogs?    |
| n2 n1 tv qpart         | do dogs chase cats?            |
| det n2 det n1 tv qpart | do the dogs chase the cats?    |
| det n1 n1 col n1 iv    | the cats, cats, and cats slept |
