# Supplementary material
Source: ML conference proceedings conference paper supplement (https://aclanthology.org/P11-1107)

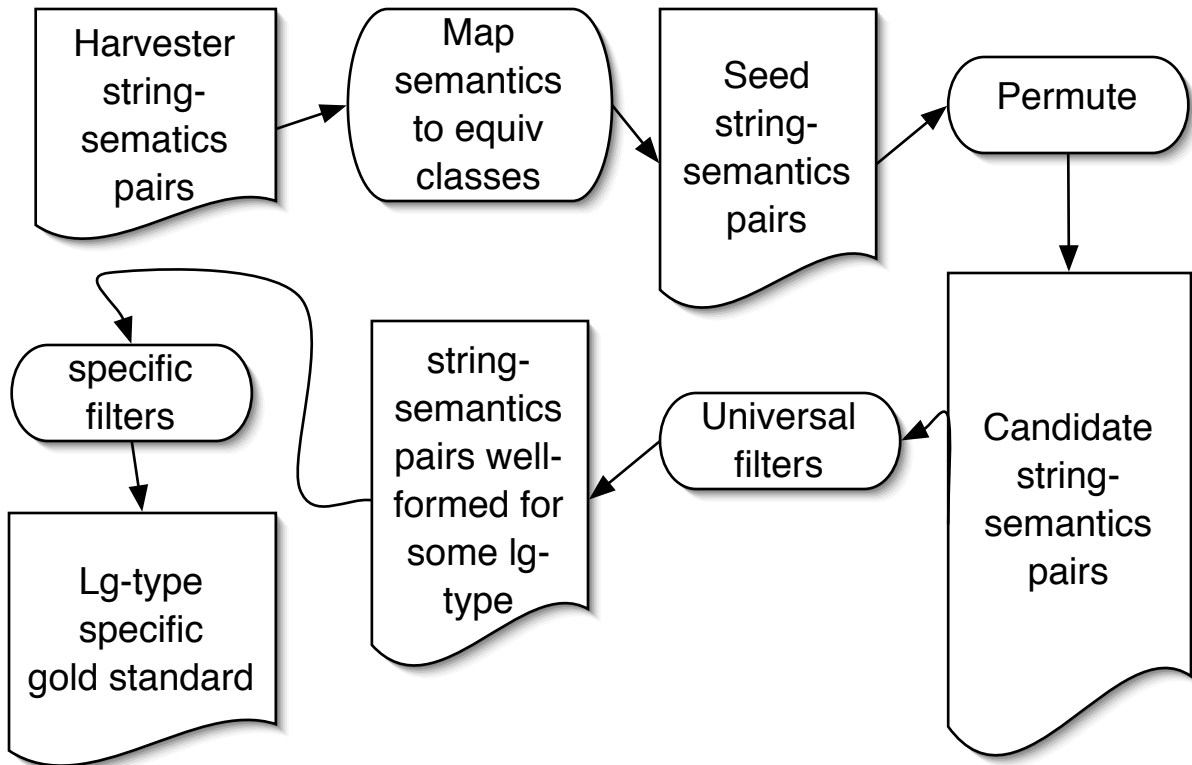

Supplement: Software [file strings.pdf › germanic-languages/doc/naacl07/strings.pdf]
